# Supplementary material
Source: publisher figshare collection journal article supplement (https://acs.figshare.com/ndownloader/files/4368109)
Supplement: Supplementary file 1 [file 4368109]

## *Supporting information*

### **Nano-fibrillation of wood pulp using a high-speed blender**

**Kojiro UETANI**, uetani-k@rsh.kyoto-u.ac.jp, +81-774-38-3657

**Hiroyuki YANO**, yano@rsh.kyoto-u.ac.jp, +81-774-38-3658

Research Institute for Sustainable Humanosphere, Kyoto University, Uji,  
611-0011, Japan

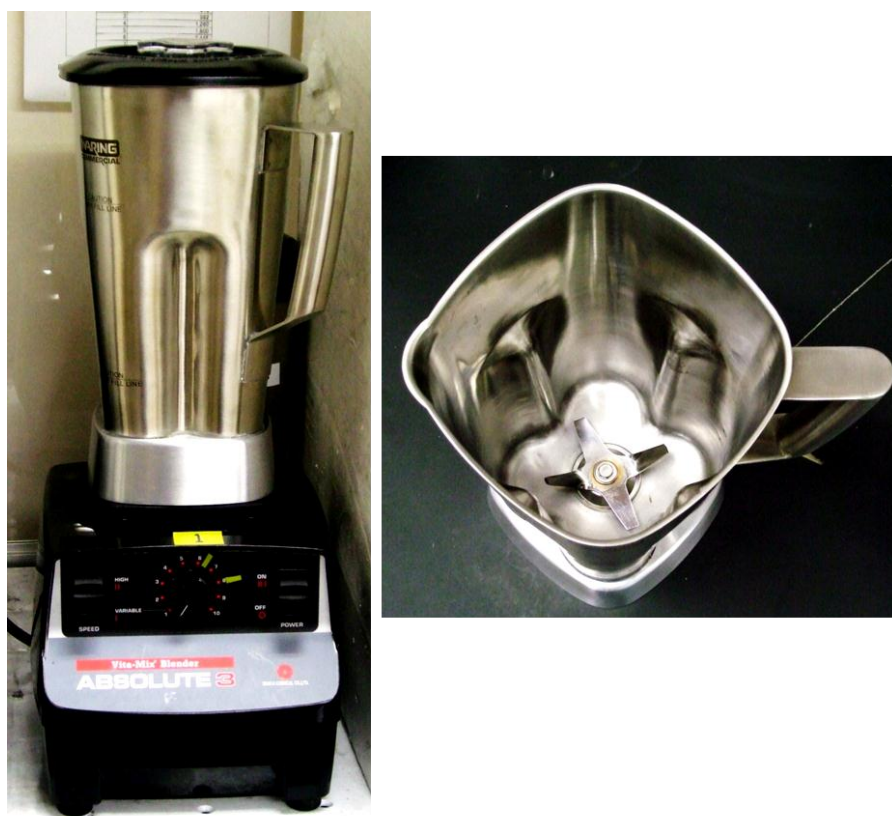

**Figure S1.** The blender used in the experiments. The stainless-steel bottle has a 4-blade propeller and an undulated inside wall.

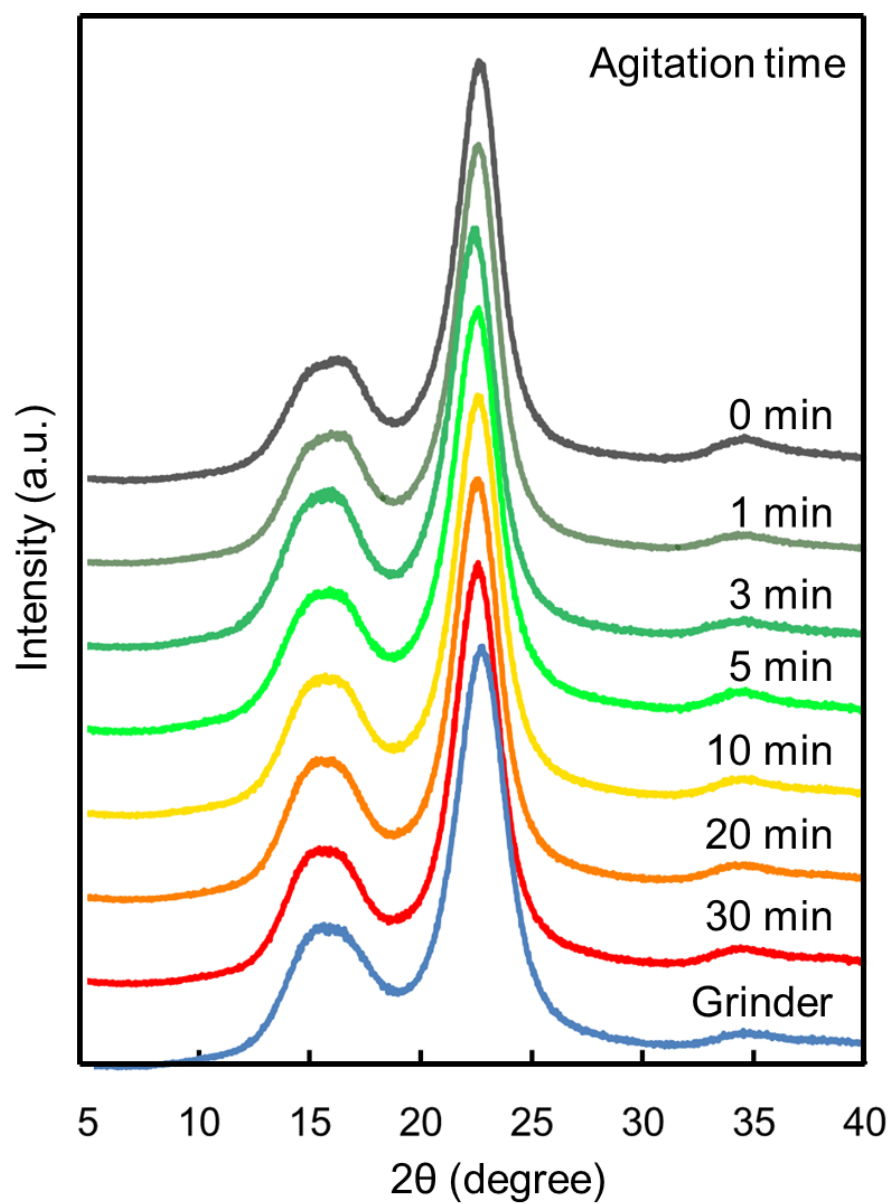

**Figure S2.** X-Ray Diffraction patterns of the pulps treated by the blender and grinder.
